# Supplementary material for: Ambipolar azomethines as potential cathodic color switching materials
Source: Royal Society of Chemistry journal article supplement (doi:10.1039/c6nj01732k), 2017-01-01
Supplement: c6nj01732k1.pdf [file c6nj01732k1.pdf]

**Electronic Supplementary Information**

**Ambipolar Azomethines As Potential Cathodic Color Switching Materials**

Marie-Hélène Tremblay, Alexandra Gellé and W.G. Skene\*

Laboratoire de caractérisation photophysique des matériaux conjugués Département de  
Chimie, Pavillon JA Bombardier, Université de Montréal, CP 6128, succ. Centre-ville,  
Montréal, Québec, Canada H3C 3J7

## Tables of Contents

|                                                                                                                                                                                                                                                                                                                                                                                                                                                                                                                                                                      |   |
|----------------------------------------------------------------------------------------------------------------------------------------------------------------------------------------------------------------------------------------------------------------------------------------------------------------------------------------------------------------------------------------------------------------------------------------------------------------------------------------------------------------------------------------------------------------------|---|
| Fig. S1 Cyclic voltammograms of <b>1</b> measured with ferrocene at 25 (—), 50 (—), 75 (—), 100 (—), 200 (—), 400 (—), 600 (—) and 800 (—) mV/s in anhydrous and deaerated dichloromethane with 0.1 M TBAPF <sub>6</sub> electrolyte. Inset: current peak of ferrocene (—) and <b>1</b> (—) as a function of (scan rate) <sup>1/2</sup> . .....                                                                                                                                                                                                                      | 3 |
| Fig. S2 Cyclic voltammograms of <b>2</b> measured with ferrocene at 25 (—), 50 (—), 75 (—), 100 (—), 200 (—), 400 (—), 600 (—) and 800 (—) mV/s in anhydrous and deaerated dichloromethane with 0.1 M TBAPF <sub>6</sub> electrolyte. Inset: current peak of ferrocene (—) and <b>2</b> (—) as a function of (scan rate) <sup>1/2</sup> . .....                                                                                                                                                                                                                      | 3 |
| Fig. S3 Cyclic voltammograms of <b>3</b> measured with ferrocene as a function of scan rate in anhydrous and deaerated dichloromethane with 0.1 M TBAPF <sub>6</sub> electrolyte 25 (—), 50 (—), 75 (—), 100 (—), 200 (—), 400 (—), 600 (—) and 800 (—) mV/s. Inset: current peak of ferrocene (—) and <b>3</b> (—) as a function of (scan rate) <sup>1/2</sup> . .....                                                                                                                                                                                              | 3 |
| Fig. S4 Cyclic voltammograms of <b>4</b> measured with ferrocene at 25 (—), 50 (—), 75 (—), 100 (—), 200 (—), 400 (—), 600 (—) and 800 (—) mV/s in anhydrous and deaerated dichloromethane with 0.1 M TBAPF <sub>6</sub> electrolyte. Inset: current peak of ferrocene (—) and <b>4</b> (—) as a function of (scan rate) <sup>1/2</sup> . .....                                                                                                                                                                                                                      | 4 |
| Fig. S5 A) Spectroelectrochemistry of <b>2</b> (A) measured in dichloromethane (—) when applying a potential greater than the corresponding E <sub>ox</sub> (—) followed by 0 V (—). Inset: pictures of the honeycomb electrode in the neutral (left) and oxidized (right) states. B) Spectroelectrochemistry of <b>3</b> measured in dichloromethane (—) when applying a potential more negative than the corresponding E <sub>red</sub> (—) followed by 0 V (—). Inset: pictures of the honeycomb electrode in the neutral (left) and reduced (right) states. .... | 4 |
| Fig. S6. Variation of transmission % of <b>1</b> monitored at 590 nm with applied potential switched between 0 and -1.5 V and held at each potential for 30 sec. ....                                                                                                                                                                                                                                                                                                                                                                                                | 5 |
| Fig. S7. Variation of transmission % of <b>2</b> monitored at 635 nm with applied potential switched between 0 and +1.2 V and held at each potential for 30 sec. ....                                                                                                                                                                                                                                                                                                                                                                                                | 5 |
| Fig. S8. Variation of transmission % of <b>3</b> monitored at 735 nm with applied potential switched between 0 and -1.1 V and held at each potential for 30 sec. ....                                                                                                                                                                                                                                                                                                                                                                                                | 5 |
| Fig. S9. Variation of transmission % of <b>3</b> monitored at 735 nm with applied potential switched between 0 and -1.1 V, held at each potential for 30 sec, and switched for 20 min. Afterwards, a potential of 0 V was applied for 10 min and the cycle repeated. ....                                                                                                                                                                                                                                                                                            | 5 |
| Fig. S10. Variation of transmission % of <b>4</b> monitored at 720 nm with applied potential switched between 0 and -1.1 V and held at each potential for 30 sec. ....                                                                                                                                                                                                                                                                                                                                                                                               | 6 |
| Fig. S11. Variation of transmission % of <b>4</b> monitored at 590 nm with applied potential switched between 0 and -1.3 V and held at each potential for 30 sec. ....                                                                                                                                                                                                                                                                                                                                                                                               | 6 |

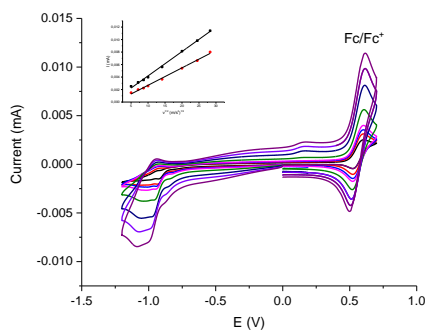

Fig. S1 Cyclic voltammograms of **1** measured with ferrocene at 25 (—), 50 (—), 75 (—), 100 (—), 200 (—), 400 (—), 600 (—) and 800 (—) mV/s in anhydrous and deaerated dichloromethane with 0.1 M TBAPF<sub>6</sub> electrolyte. Inset: current peak of ferrocene (—) and **1** (—) as a function of (scan rate)<sup>1/2</sup>.

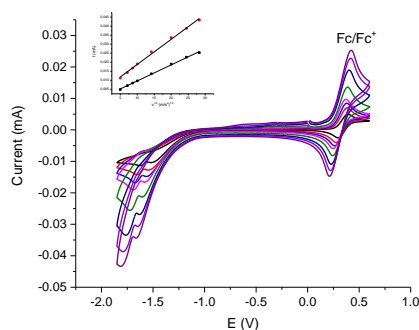

Fig. S2 Cyclic voltammograms of **2** measured with ferrocene at 25 (—), 50 (—), 75 (—), 100 (—), 200 (—), 400 (—), 600 (—) and 800 (—) mV/s in anhydrous and deaerated dichloromethane with 0.1 M TBAPF<sub>6</sub> electrolyte. Inset: current peak of ferrocene (—) and **2** (—) as a function of (scan rate)<sup>1/2</sup>.

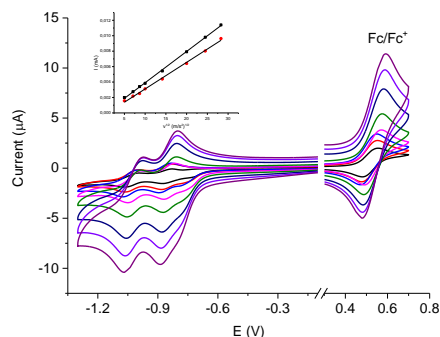

Fig. S3 Cyclic voltammograms of **3** measured with ferrocene as a function of scan rate in anhydrous and deaerated dichloromethane with 0.1 M TBAPF<sub>6</sub> electrolyte 25 (—), 50 (—), 75 (—), 100 (—), 200 (—), 400 (—), 600 (—) and 800 (—) mV/s. Inset: current peak of ferrocene (—) and **3** (—) as a function of (scan rate)<sup>1/2</sup>.

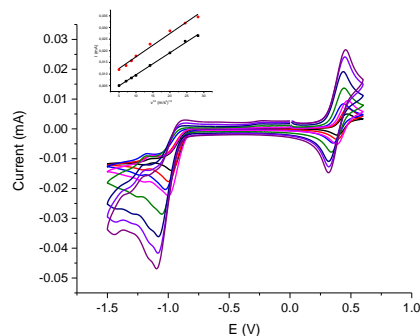

Fig. S4 Cyclic voltammograms of **4** measured with ferrocene at 25 (—), 50 (—), 75 (—), 100 (—), 200 (—), 400 (—), 600 (—) and 800 (—) mV/s in anhydrous and deaerated dichloromethane with 0.1 M TBAPF<sub>6</sub> electrolyte. Inset: current peak of ferrocene (—) and **4** (—) as a function of (scan rate)<sup>1/2</sup>.

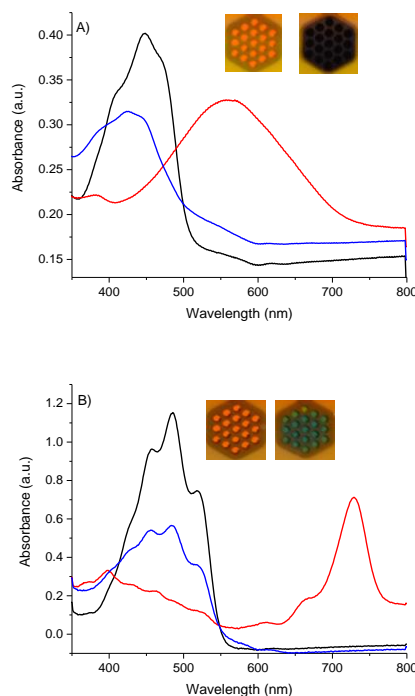

Fig. S5 A) Spectroelectrochemistry of **2** (A) measured in dichloromethane (—) when applying a potential greater than the corresponding  $E_{ox}$  (—) followed by 0 V (—). Inset: pictures of the honeycomb electrode in the neutral (left) and oxidized (right) states. B) Spectroelectrochemistry of **3** measured in dichloromethane (—) when applying a potential more negative than the corresponding  $E_{red}$  (—) followed by 0 V (—). Inset: pictures of the honeycomb electrode in the neutral (left) and reduced (right) states.

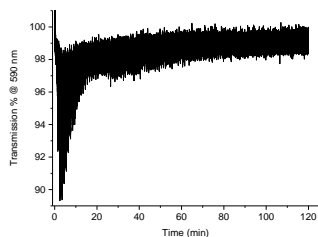

Fig. S6. Variation of transmission % of **1** monitored at 590 nm with applied potential switched between 0 and -1.5 V and held at each potential for 30 sec.

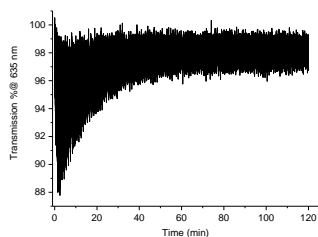

Fig. S7. Variation of transmission % of **2** monitored at 635 nm with applied potential switched between 0 and +1.2 V and held at each potential for 30 sec.

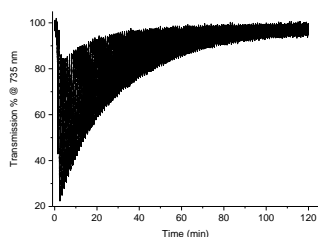

Fig. S8. Variation of transmission % of **3** monitored at 735 nm with applied potential switched between 0 and -1.1 V and held at each potential for 30 sec.

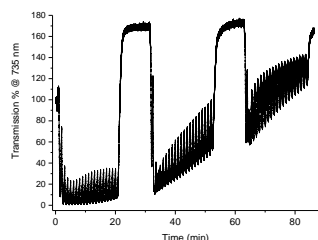

Fig. S9. Variation of transmission % of **3** monitored at 735 nm with applied potential switched between 0 and -1.1 V, held at each potential for 30 sec, and switched for 20 min. Afterwards, a potential of 0 V was applied for 10 min and the cycle repeated.

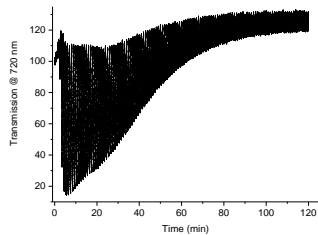

Fig. S10. Variation of transmission % of **4** monitored at 720 nm with applied potential switched between 0 and -1.1 V and held at each potential for 30 sec.

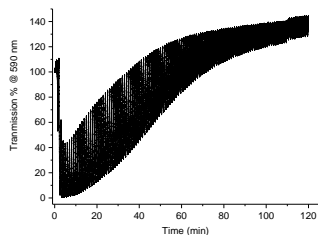

Fig. S11. Variation of transmission % of **4** monitored at 590 nm with applied potential switched between 0 and -1.3 V and held at each potential for 30 sec.
